# Supplementary material for: A Molecular Electron Density Theory Study of the Synthesis of Spirobipyrazolines through the Domino Reaction of Nitrilimines with Allenoates
Source: PubMed Central journal article supplement (PMC6891705; doi:10.3390/molecules24224159), 2019-11-16
Supplement: molecules-24-04159-s001.pdf [file molecules-24-04159-s001.pdf]

## Supplementary Material

### A Molecular Electron Density Theory Study of the Synthesis of Spirobipyrazolines through the Domino Reaction of Nitrilimines with Allenates

Luis R. Domingo,<sup>a</sup> Fatemeh Ghodsi,<sup>b</sup> Mar R ós-Guti érez<sup>a,c</sup>

- a) Department of Organic Chemistry, University of Valencia, Dr Moliner 50, 46100 Burjassot, Valencia, Spain
- b) Department of Chemistry, University of Sistan and Baluchestan, Zahedan, Iran
- c) Department of Chemistry and Chemical Biology, McMaster University, 1280 Main Street West, Hamilton, Ontario L8S 4L8, Canada

#### Index

- S2** Study of the reaction paths associated to the *cb-type* 32CA reaction of dimethyl NI **13** with the  $\alpha,\beta$ -conjugated C4-C5 double bond of methyl 1-methyl-allenoate **4**.
- S4** Table with the MPWB1K/6-311G(d) electronic energies, enthalpies, entropies and Gibbs free energies, computed at 25 °C in DCM, of the stationary points involved in the domino reaction of diphenyl NI **1** with allenoate **4**.
- S5** Table with the MPWB1K/6-311G(d) electronic energies, enthalpies, entropies and Gibbs free energies, computed at 25 °C in DCM, of the stationary points involved in the *cb-type* 32CA reaction of dimethyl NI **13** with the  $\alpha,\beta$ -conjugated C4-C5 double bond of methyl 1-methyl-allenoate **4**.

*Study of the reaction paths associated to the cb-type 32CA reaction of dimethyl NI 13 with the  $\alpha,\beta$ -conjugated C4-C5 double bond of methyl 1-methyl-allenoate 4.*

The two regioisomeric reaction paths associated to the *cb-type* 32CA reaction between dimethyl NI **13** and the  $\alpha,\beta$ -conjugated C4-C5 double bond of methyl 1-methyl-allenoate **4** were studied for a comparative analysis. They are related with the initial two-centre interaction between the most electrophilic centre of methyl 1-methyl-allenoate **4**, the  $\beta$ -conjugate C5 carbon, and the C1 carbon or the N3 nitrogen of dimethyl NI **13**. Relative enthalpies and Gibbs free energies in DCM are given in [Scheme S1](#).

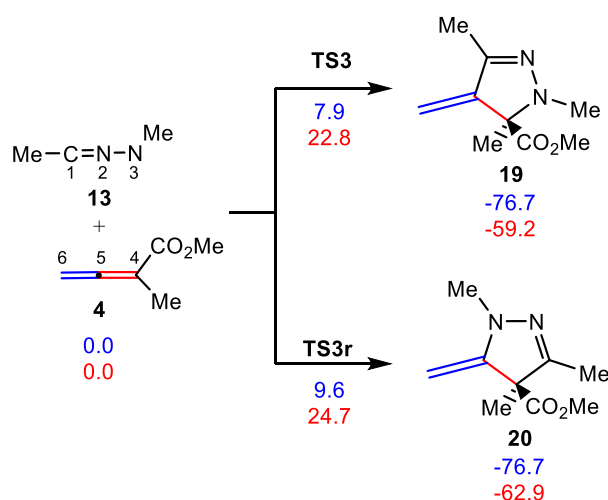

**Scheme S1.** Regioisomeric reaction paths associated with the *cb-type* 32CA reaction of dimethyl NI **13** with the  $\alpha,\beta$ -conjugated C4-C5 double bond of methyl 1-methyl-allenoate **4**. MPWB1K/6-311G(d) relative enthalpies, in blue, and Gibbs free energies, in red, are given in kcal mol<sup>-1</sup>.

This *cb-type* 32CA reaction takes place through a one-step mechanism. Consequently, two regioisomeric TSs, **TS3** and **TS3r**, and two pyrazolines, **19** and **20**, were located and characterised. The activation enthalpies associated to the two competitive reaction paths are 7.9 (**TS3**) and 9.6 (**TS3r**) kcal mol<sup>-1</sup>, the reaction being strongly exothermic by 76.7 (**19**) and 76.7 (**20**) kcal mol<sup>-1</sup>. Some appealing conclusions can be drawn from these energy results: i) the more favourable reaction path, which is associated with the formation of pyrazoline **19** via **TS3**, presents an activation enthalpy of 7.9 kcal mol<sup>-1</sup>. This value is 2.7 kcal mol<sup>-1</sup> lower than that associated with the 32CA reaction of diphenyl NI **1** with allenoate **4** (see [Scheme 5](#)). This reaction path is associated with the attack of the carbenoid C1 carbon of dimethyl NI **13** on the conjugated C5 carbon of allenoate **4**; ii) the attack of dimethyl NI **13** on the  $\alpha,\beta$ -conjugated C4-C5 double bond of allenoate **4** is regioselective as **TS3r** is 1.7 kcal mol<sup>-1</sup> above **TS3**; and iii) formation of

pyrazoline **19** is strongly exothermic by 76.7 kcal mol<sup>-1</sup>. Consequently, this 32CA reaction can be considered irreversible.

The geometries of the TSs involved in the two competitive reaction paths associated with in the attack of dimethyl NI **13** on the  $\alpha,\beta$ -conjugated C4–C5 double bond of allenoate **4** are given in Figure S1. At **TS3** the distances between the C1 and C5, and the N3 and the C4 centers are 2.196 and 2.609 Å, while **TS3r** the distances between the N3 and C5, and the C1 and the C6 centers are 2.123 and 2.514 Å. Some appealing conclusions can be drawn from these geometrical parameters: i) the two TSs show a high asynchronicity; ii) in the two TSs, the short distance corresponds to the C1(N3)–C5 one, involving the  $\beta$ -conjugated C5 carbon of allenoate **4**; iii) considering that the C–C and C–N bond formation begins in the narrow range of distances of 2.0 - 1.9 and 1.9-1.8 Å, respectively, the distances between these interacting centers at these TSs indicate that formation of the C(N)-C single bond has not begun at any TSs; and finally iv) these distance at **TS3** are closer to those found at **TS11**, indicating that substitution of the two methyl groups in NI **13** for two phenyl groups In NI **1** does not produce any significant change in the TSs geometries.

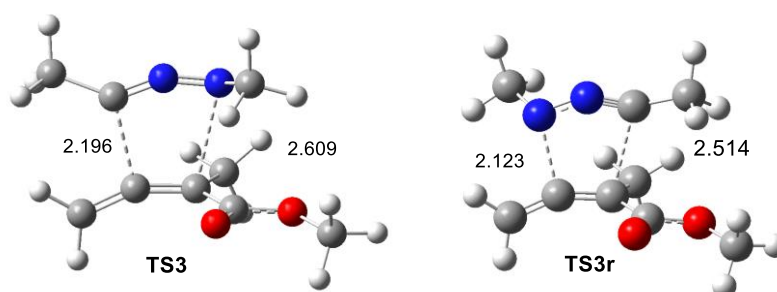

**Figure S1.** MPWB1K/6-311G(d) geometries in DCM of the two regioisomeric TSs involved in the 32CA reaction of dimethyl NI **13** with the  $\alpha,\beta$ -conjugated C4-C5 double bond of methyl 1-methyl-allenoate **4**. Distances are given in Angstroms.

The polar character of this 32CA reaction was evaluated analysing the GEDT at the two regioisomeric TSs. Reactions with GEDT values of 0.0e correspond to non-polar processes, while values higher than 0.2e correspond to polar processes. The GEDT, which fluxes from the NI framework to the allenoate one is 0.21e at **TS3** and 0.21e at **TS3r**. These data indicate that this *cb-type* 32CA reaction has a polar character.

**Table S1.** MPWB1K/6-311G(d) Electronic energies (E, in a.u.), enthalpies (H, in a.u.), entropies (S, in cal mol<sup>-1</sup> K<sup>-1</sup>) and Gibbs free energies (G, in au), computed at 25 °C in DCM, of the stationary points involved in the domino reaction of diphenyl NI **1** with allenolate **4**.

|              | <b>E</b>     | <b>H</b>     | <b>S</b> | <b>G</b>     |
|--------------|--------------|--------------|----------|--------------|
| <b>1</b>     | -610.633942  | -610.420304  | 116.2    | -610.475521  |
| <b>4</b>     | -383.748053  | -383.607066  | 92.8     | -383.651176  |
|              | -994.381995  | -994.027370  | 209.1    | -994.126697  |
| <b>TS11</b>  | -994.365799  | -994.010482  | 152.4    | -994.082911  |
| <b>TS11r</b> | -994.360419  | -994.005107  | 153.8    | -994.078176  |
| <b>TS21</b>  | -994.355672  | -994.000266  | 159.9    | -994.076251  |
| <b>TS21r</b> | -994.354445  | -993.999362  | 158.5    | -994.074673  |
| <b>6</b>     | -994.499070  | -994.138652  | 148.1    | -994.209023  |
| <b>15</b>    | -994.500514  | -994.140017  | 148.4    | -994.210512  |
| <b>14</b>    | -994.516074  | -994.155136  | 147.8    | -994.225380  |
| <b>16</b>    | -994.509506  | -994.148330  | 148.7    | -994.219002  |
| <b>TS12</b>  | -1605.121124 | -1604.546407 | 208.7    | -1604.645544 |
| <b>TS12r</b> | -1605.117069 | -1604.542144 | 207.1    | -1604.640565 |
| <b>TS22</b>  | -1605.128913 | -1604.553619 | 202.1    | -1604.649659 |
| <b>TS2r</b>  | -1605.130346 | -1604.555617 | 210.7    | -1604.655747 |
| <b>5</b>     | -1605.229379 | -1604.650092 | 202.4    | -1604.746280 |
| <b>17</b>    | -1605.226631 | -1604.646545 | 203.5    | -1604.743227 |
| <b>18</b>    | -1605.229049 | -1604.649476 | 205.8    | -1604.747256 |

**Table S2.** MPWB1K/6-311G(d) Electronic energies (E, in a.u.), enthalpies (H, in a.u.), entropies (S, in cal mol<sup>-1</sup> K<sup>-1</sup>) and Gibbs free energies (G, in au), computed at 25 °C in DCM, of the stationary points involved in the *cb-type* 32CA reaction of dimethyl NI **13** with the  $\alpha,\beta$ -conjugated C4-C5 double bond of methyl1-methyl-allenoate **4**.

|             | <b>E</b>    | <b>H</b>    | <b>S</b> | <b>G</b>    |
|-------------|-------------|-------------|----------|-------------|
| <b>4</b>    | -383.748053 | -383.607066 | 92.8     | -383.651176 |
| <b>13</b>   | -227.248892 | -227.150141 | 81.0     | -227.188648 |
| <b>TS3</b>  | -610.985468 | -610.744567 | 124.0    | -610.803464 |
| <b>TS3r</b> | -610.982578 | -610.741854 | 123.3    | -610.800447 |
| <b>19</b>   | -611.124942 | -610.879418 | 115.4    | -610.934244 |
| <b>20</b>   | -611.129451 | -610.88403  | 117.9    | -610.940026 |
